# Supplementary material for: Efficacy of Compounds Isolated from Streptomyces olivaceus against the Morphogenesis and Virulence of Candida albicans
Source: PubMed Central journal article supplement (PMC6723460; doi:10.3390/md17080442), 2019-07-26

## Supplementary Information

### **Efficacy of compounds isolated from *Streptomyces olivaceus* on the morphogenesis and virulence of *Candida albicans***

Lili Meng<sup>1,2#</sup>, Changli Sun<sup>3#</sup>, Chunyan Zhang<sup>3</sup>, Shihao Song<sup>1,2</sup>, Xiuyun Sun<sup>1,2</sup>, Jianhua Ju<sup>3</sup>,  
Yinyue Deng<sup>1\*</sup>

<sup>1</sup>*School of Pharmaceutical Sciences (Shenzhen), Sun Yat-sen University, Guangzhou 510275, China*

<sup>2</sup>*College of Agriculture, South China Agricultural University, Guangzhou 510642, China*

<sup>3</sup>*CAS Key Laboratory of Tropical Marine Bio-resources and Ecology, South China Sea Institute of Oceanology, Chinese Academy of Sciences, 164 West Xingang Road, Guangzhou 510301, China*

#These authors contributed equally to this work.

\***Corresponding author:** Yinyue Deng: [yinyue\\_deng@hotmail.com](mailto:yinyue_deng@hotmail.com)

Tel.:(+86)2085286471; Fax: (+86)2085280203

**Table S1.** List of compounds used in this study (The leading compounds were highlighted in red color).

| Structure & name                                                                                                                        | <sup>1</sup> H-NMR descriptions                                                                                                                                                                                                                          | <sup>13</sup> C-NMR descriptions                                                                                                                                                                                                          |
|-----------------------------------------------------------------------------------------------------------------------------------------|----------------------------------------------------------------------------------------------------------------------------------------------------------------------------------------------------------------------------------------------------------|-------------------------------------------------------------------------------------------------------------------------------------------------------------------------------------------------------------------------------------------|
| 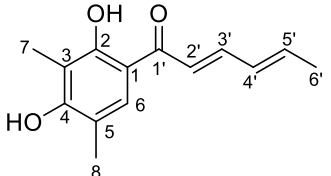<br><b>Sorbicillin (1)</b>                             | 7.44 (1H, s, H-6), 2.22 (3H, s, H-8), 2.15 (3H, s, H-7),<br>1.91(3H, d, <i>J</i> = 6.4 Hz, H-6').                                                                                                                                                        | 110.4 (s, C-1), 162.6 (s, C-2), 113.5 (s, C-3), 158.7 (s, C-4), 114.5<br>(s, C-5), 128.8 (d, C-6), 7.5 (q, C-7), 15.6 (q, C-8), 192.5 (s, C-1'),<br>121.9 (d, C-2'), 144.5 (d, C-3'), 130.6 (d, C-4'), 141.3 (d, C-5'),<br>18.9 (q, C-6') |
| <br><b>3-methyl-N-(2'-phenylethyl) butyramide (2)</b>  | 7.16-7.27 (5H, m, H-4', 5', 6', 7', 8'), 3.39(2H, m, H-1'), 3.40<br>(2H, t, <i>J</i> = 7.3 Hz, H-2), 2.78 (2H, t, <i>J</i> = 7.5 Hz, H-2'), 2.01<br>(1H, overlapped, H-3'), 2.01 (2H, overlapped, H-1'), 0.89<br>(6H, d, <i>J</i> = 6.7 Hz, H-4 and H-5) | 174.2 (s, C-1), 40.5(t, C-2), 26.0 (d, C-3), 21.3(q, C-4 and C-5),<br>45.0 (t, C-1'), 35.2 (t, C-2'), 139.1 (s, C-3'), 128.4 (d, C-4',8'),<br>128.1 (d, C-5',7'), 125.9 (d, C-6')                                                         |
| <br><b>2-methyl-N-(2'-phenylethyl)-butyramide (3)</b> | 7.18-7.27 (5H, m, H-4',5',6',7',8'), 3.39(2H, m, H-1'), 2.80<br>(2H, m, H-2'), 2.14 (1H, m, H-2), 1.38 (2H, m, H-3), 1.04<br>(3H, d, <i>J</i> = 6.9 Hz, H-5), 0.83(3H, t, <i>J</i> = 7.4 Hz, H-4)                                                        | 178.1(s, C-1), 42.2(d, C-2), 26.9 (t, C-3), 16..7(q, C-4), 10.9 (q,<br>C-5), 40.4 (t, C-1'), 35.2 (t, C-2'), 139.2 (s, C-3'), 128.0 (d, C-4',8'),<br>128.5 (d, C-5',7'), 139.2 (d, C-6')                                                  |

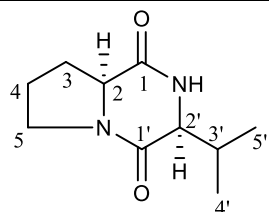

4.20 (1H, m, H-2), 3.55 (1H, m, H-5a), 3.50 (1H, m, H-5b),  
2.48 (1H, m, H-3a), 2.32 (1H, m, H-3b), 2.06 (1H, m, H-3'),  
2.02 (1H, m, H-4a), 1.94 (1H, m, H-4b), 1.09 (3H, d,  $J = 7.2$   
Hz, H-4'), 0.93 (3H, d,  $J = 6.9$  Hz, H-5')

171.2 (s, C-1), 58.6 (d, C-2), 21.9 (t, C-3), 28.1 (t, C-4), 44.8 (t,  
C-5), 166.2 (s, C-1'), 60.1 (d, C-2'), 28.5 (d, C-3'), 17.5 (q, C-4'),  
15.3 (q, C-5')

cyclo-(L-Val-L-Pro) (4)

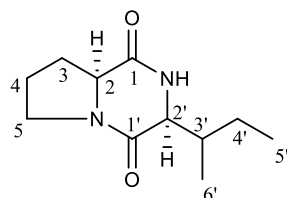

4.19 (1H, m, H-2), 4.07 (1H, br. s, H-2'), 3.63 (1H, m, H-5a),  
3.56 (1H, m, H-5b), 2.32 (1H, m, H-3a), 2.16 (1H, m, H-3b),  
2.03 (1H, m, H-4a), 1.93 (1H, m, H-4b), 1.44-1.31 (2H, m,  
H-4'), 1.06 (3H, d,  $J = 7.1$  Hz, H-5'), 0.93 (3H, t,  $J = 7.4$  Hz,  
H-5')

166.2 (s, C-1), 58.6 (d, C-2), 21.8 (t, C-3), 28.1 (t, C-4), 44.8 (t,  
C-5), 171.0 (s, C-1'), 59.9 (d, C-2'), 35.7 (d, C-3'), 24.0 (t, C-4'),  
11.1 (q, C-5'), 14.1 (q, C-6')

cyclo-(L-Ile-L-Pro) (5)

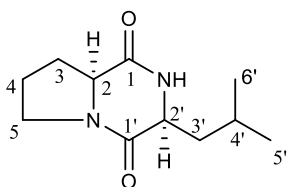

4.26 (1H, m, H-2), 4.12 (1H, br. s, H-2'), 3.64 (1H, m, H-5a),  
3.51 (1H, m, H-5b), 2.30 (1H, m, H-3a), 2.01 (1H, m, H-4a),  
1.91 (1H, m, H-4b), 0.96 (3H, d,  $J = 6.3$  Hz, H-5'), 0.95 (3H,  
t,  $J = 6.3$  Hz, H-6')

167.5 (s, C-1), 58.9 (d, C-2), 21.9 (t, C-3), 27.7 (t, C-4), 45.0 (t,  
C-5), 171.4 (s, C-1'), 53.2 (d, C-2'), 38.0 (t, C-3'), 24.4 (d, C-4'),  
21.9 (q, C-5'), 20.8 (q, C-6')

cyclo-(L-Leu-L-Pro) (6)

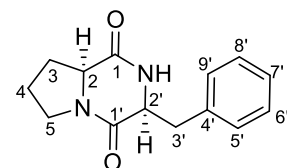

7.21- 7.29 (5H, m, H-5', 6', 7', 8', 9'), 4.44 (2H, t,  $J = 4.6$  Hz,  
H-2'), 4.06 (1H, m, H-2), 2.08 (1H, m, H-4a), 1.80 (1H, m,  
H-4b)

169.5 (s, C-1), 58.7 (d, C-2), 21.4 (t, C-3), 28.0 (t, C-4), 44.7 (t,  
C-5), 165.5 (s, C-1'), 56.3(d, C-2'), 36.8(t, C-3'), 136.0 (s, C-4'),  
128.1 (d, C-5',9'), 129.7 (q, C-6',8'), 126.7 (d, C-7')

cyclo-(L-Phe-L-Pro) (7)

**Table S2.** List of genes differentially expressed (Log<sub>2</sub> fold change) in *C. albicans* treated by compound 2 (Log<sub>2</sub> fold change ≥ 1.5) .

| Gene ID          | Gene name <sup>a</sup> | Description                                        | q-PCR     | RNA-seq |
|------------------|------------------------|----------------------------------------------------|-----------|---------|
| CAALFM_C405580CA | -                      | hypothetical protein                               |           | 9.92    |
| CAALFM_C113080WA | OP4                    | Ala- Leu- and Ser-rich protein                     | 8.28±0.24 | 9.41    |
| CAALFM_C105890WA | -                      | hypothetical protein                               |           | 7.40    |
| CAALFM_C300920WA | ATO1                   | Putative fungal-specific transmembrane protein     |           | 6.22    |
| CAALFM_C306580WA | JEN1                   | Lactate transporter                                |           | 6.02    |
| CAALFM_C202230CA | -                      | hypothetical protein                               |           | 5.44    |
| CAALFM_C102520WA | SCW4                   | Putative cell wall protein                         | 4.63±0.15 | 5.32    |
| CAALFM_C500540CA | AGA1                   | Protein with some similarity to agglutinin subunit | 3.94±0.86 | 4.73    |
| CAALFM_CR10320WA | -                      | hypothetical protein                               |           | 4.64    |
| CAALFM_C206680WA | FRP3                   | putative ammonium permease                         |           | 4.27    |
| CAALFM_C203350WA | PGA17                  | Putative GPI-anchored protein                      | 4.48±0.87 | 4.20    |
| CAALFM_C401070WA | HGT17                  | Putative MFS family glucose transporter            |           | 4.17    |
| CAALFM_C301930WA | PXP2                   | Putative acyl-CoA oxidase                          | 3.56±0.08 | 4.14    |
| CAALFM_C107580CA | PRY1                   | Pry family pathogenesis-related protein            | 3.14±0.11 | 4.02    |
| CAALFM_C202060CA | FMO1                   | Putative oxidoreductase                            |           | 3.59    |
| CAALFM_C404020CA | -                      | hypothetical protein                               |           | 3.36    |
| CAALFM_C108330CA | ADH2                   | alcohol dehydrogenase                              |           | 3.23    |
| CAALFM_C300930WA | ATO2                   | Putative fungal-specific transmembrane protein     |           | 3.16    |
| CAALFM_C202970CA | ALD5                   | aldehyde dehydrogenase (NAD(P)(+))                 |           | 3.11    |
| CAALFM_CR02490WA | OPT4                   | Oligopeptide transporter                           |           | 3.07    |
| CAALFM_C401100CA | AGP2                   | Amino acid permease                                |           | 3.07    |
| CAALFM_C504380CA | -                      | hypothetical protein                               |           | 3.04    |
| CAALFM_C210350CA | ACS1                   | acetate--CoA ligase 1                              |           | 3.03    |

|                  |        |                                                               |  |      |
|------------------|--------|---------------------------------------------------------------|--|------|
| CAALFM_C303580CA | GTT13  | Putative glutathione S-transferase                            |  | 2.91 |
| CAALFM_C114020WA | -      | hypothetical protein                                          |  | 2.85 |
| CAALFM_C105960WA | PGA45  | Putative GPI-anchored cell wall protein                       |  | 2.78 |
| CAALFM_C201020WA | HGT6   | hexose transporter                                            |  | 2.60 |
| CAALFM_C704180WA | FAA2-3 | Predicted acyl CoA synthetase                                 |  | 2.59 |
| CAALFM_C700290CA | HGT13  | Predicted sugar transporter, involved in glycerol utilization |  | 2.56 |
| CAALFM_C301960CA | POX1-3 | acyl-CoA oxidase                                              |  | 2.49 |
| CAALFM_C101240WA | IFD3   | Putative aldo/keto reductase                                  |  | 2.47 |
| Novel00031       | -//-   |                                                               |  | 2.43 |
| CAALFM_C205250CA | AAT1   | aspartate transaminase                                        |  | 2.41 |
| CAALFM_C205820WA | -      | hypothetical protein                                          |  | 2.40 |
| CAALFM_C106810WA | CAT1   | catalase A                                                    |  | 2.29 |
| CAALFM_CR08990CA | -      | hypothetical protein                                          |  | 2.25 |
| CAALFM_C604620CA | NAG4   | Putative transporter; fungal-specific                         |  | 2.24 |
| CAALFM_C307160WA | PGA32  | Putative GPI-anchored adhesin-like protein                    |  | 2.22 |
| CAALFM_C400650WA | HIS5   | histidinol-phosphate transaminase                             |  | 2.18 |
| CAALFM_C302790WA | -      | hypothetical protein                                          |  | 2.16 |
| CAALFM_C703310WA | -      | hypothetical protein                                          |  | 2.15 |
| CAALFM_CR06770CA | -      | hypothetical protein                                          |  | 2.12 |
| CAALFM_C400080CA | -      | hypothetical protein                                          |  | 2.11 |
| CAALFM_CR06460WA | GST3   | Glutathione S-transferase                                     |  | 2.07 |
| CAALFM_C106860WA | -      | hypothetical protein                                          |  | 2.06 |
| CAALFM_C111320CA | -      | hypothetical protein                                          |  | 2.06 |
| CAALFM_CR00200WA | PCK1   | phosphoenolpyruvate carboxykinase                             |  | 2.06 |
| CAALFM_C106550WA | GLT1   | glutamate synthase (NADH)                                     |  | 2.02 |

|                  |       |                                                                                  |  |      |
|------------------|-------|----------------------------------------------------------------------------------|--|------|
| CAALFM_C204460WA | LYS22 | Homocitrate synthase, minor isoform                                              |  | 2.01 |
| CAALFM_C100170WA | LEU4  | 2-isopropylmalate synthase                                                       |  | 2.00 |
| CAALFM_C401800WA | -     | hypothetical protein                                                             |  | 1.99 |
| CAALFM_C601430CA | FRP6  | Putative ammonia transport protein                                               |  | 1.97 |
| CAALFM_C202030WA | ARO3  | 3-deoxy-7-phosphoheptulonate synthase                                            |  | 1.93 |
| CAALFM_C102620CA | HOM6  | homoserine dehydrogenase                                                         |  | 1.84 |
| CAALFM_CR01930CA | BIO2  | biotin synthase                                                                  |  | 1.84 |
| CAALFM_C306920WA | -     | putative phosphomutase                                                           |  | 1.83 |
| CAALFM_C109580CA | LIP1  | Secreted lipase                                                                  |  | 1.82 |
| CAALFM_C503130WA | SUT1  | Zn2Cys6 transcription factor involved in sterol uptake                           |  | 1.82 |
| CAALFM_C301060WA | -     | hypothetical protein                                                             |  | 1.80 |
| CAALFM_C301480CA | RKI1  | ribose-5-phosphate isomerase                                                     |  | 1.78 |
| CAALFM_C402150CA | -     | hypothetical protein                                                             |  | 1.77 |
| CAALFM_C401200CA | AAT22 | Aspartate aminotransferase                                                       |  | 1.76 |
| CAALFM_C305580CA | GAP2  | amino acid permease                                                              |  | 1.76 |
| CAALFM_C601500CA | TRY5  | Zn(II)2Cys6 transcription factor                                                 |  | 1.75 |
| CAALFM_C405320WA | LYS1  | saccharopine dehydrogenase (NAD+-%2C L-lysine-forming)                           |  | 1.74 |
| CAALFM_C206990WA | -     | hypothetical protein                                                             |  | 1.74 |
| CAALFM_C603320WA | -     | hypothetical protein                                                             |  | 1.73 |
| CAALFM_C102820WA | LYS2  | L-aminoadipate-semialdehyde dehydrogenase                                        |  | 1.73 |
| CAALFM_C205360CA | BIO32 | Putative class III aminotransferase with a predicted role in biotin biosynthesis |  | 1.72 |
| CAALFM_C202550CA | -     | hypothetical protein                                                             |  | 1.72 |
| CAALFM_C108410CA | SAM4  | S-adenosylmethionine-homocysteine S-methyltransferase                            |  | 1.72 |
| CAALFM_CR07740WA | -     | hypothetical protein                                                             |  | 1.68 |

|                  |       |                                                                        |  |      |
|------------------|-------|------------------------------------------------------------------------|--|------|
| CAALFM_C102270CA | -     | hypothetical protein                                                   |  | 1.68 |
| CAALFM_C108980CA | ZWF1  | glucose-6-phosphate dehydrogenase                                      |  | 1.68 |
| CAALFM_C300650WA | NGT1  | N-acetylglucosamine (GlcNAc)-specific transporter                      |  | 1.67 |
| CAALFM_C404160WA | -     | hypothetical protein                                                   |  | 1.67 |
| CAALFM_C107200WA | YMC1  | organic acid transporter                                               |  | 1.66 |
| CAALFM_CR05480WA | -     | mitochondrial 2-oxodicarboxylate carrier                               |  | 1.65 |
| CAALFM_C503060CA | TNA1  | Putative nicotinic acid transporter                                    |  | 1.65 |
| CAALFM_C402230CA | -     | hypothetical protein                                                   |  | 1.64 |
| CAALFM_C103720CA | -     | hypothetical protein                                                   |  | 1.64 |
| CAALFM_CR00640WA | ACC1  | acetyl-CoA carboxylase                                                 |  | 1.64 |
| CAALFM_C401340WA | -     | hypothetical protein                                                   |  | 1.64 |
| CAALFM_C205990CA | -     | hypothetical protein                                                   |  | 1.63 |
| CAALFM_CR10570CA | YHB4  | Protein related to flavohemoglobins                                    |  | 1.62 |
| CAALFM_C204280WA | -     | hypothetical protein                                                   |  | 1.61 |
| CAALFM_C306860CA | -     | aldo-keto reductase superfamily protein                                |  | 1.61 |
| CAALFM_C201010WA | HGT8  | High-affinity glucose transporter of the major facilitator superfamily |  | 1.61 |
| CAALFM_C104020CA | CSH1  | Aldo-keto reductase                                                    |  | 1.60 |
| CAALFM_C304270CA | CTP1  | Putative citrate transport protein                                     |  | 1.59 |
| CAALFM_C101620CA | -     | hypothetical protein                                                   |  | 1.58 |
| CAALFM_C108900WA | -     | hypothetical protein                                                   |  | 1.58 |
| CAALFM_C304830CA | FAS2  | trifunctional fatty acid synthase subunit                              |  | 1.58 |
| CAALFM_C205890CA | IDP1  | isocitrate dehydrogenase (NADP(+))                                     |  | 1.58 |
| CAALFM_C305220WA | CDR1  | ATP-binding cassette multidrug transporter                             |  | 1.57 |
| CAALFM_C604310WA | PEX11 | Putative peroxisomal membrane protein                                  |  | 1.57 |
| CAALFM_C200510WA | -     | hypothetical protein                                                   |  | 1.57 |

|                  |        |                                                        |  |       |
|------------------|--------|--------------------------------------------------------|--|-------|
| CAALFM_C400830WA | SPS20  | Peroxisomal 2,4-dienoyl-CoA reductase                  |  | 1.56  |
| CAALFM_C602500CA | GCV1   | glycine decarboxylase subunit T                        |  | 1.55  |
| CAALFM_CR06340CA | PGI1   | glucose-6-phosphate isomerase                          |  | 1.54  |
| CAALFM_C305210CA | DYN1   | dynein heavy chain                                     |  | 1.54  |
| CAALFM_C105950CA | -      | hypothetical protein                                   |  | 1.54  |
| CAALFM_C206100WA | PMT4   | dolichyl-phosphate-mannose-protein mannosyltransferase |  | 1.54  |
| CAALFM_CR06810WA | HHT2   | histone                                                |  | 1.53  |
| CAALFM_CR01400WA | LYS12  | homoisocitrate dehydrogenase                           |  | 1.53  |
| CAALFM_C302750WA | -      | hypothetical protein                                   |  | 1.52  |
| CAALFM_C101360CA | -      | glycogenin glucosyltransferase                         |  | 1.51  |
| CAALFM_CR07760WA | -      | mitochondrial 37S ribosomal protein RSM19              |  | -1.50 |
| CAALFM_C501830CA | HAL9   | Putative Zn(II)2Cys6 transcription factor              |  | -1.50 |
| CAALFM_CR05170CA | FDH1   | formate dehydrogenase (NAD <sup>+</sup> )              |  | -1.51 |
| CAALFM_C700940WA | -      | serine-type carboxypeptidase                           |  | -1.51 |
| CAALFM_C701680CA | -      | hypothetical protein                                   |  | -1.52 |
| CAALFM_CR08420WA | -      | hypothetical protein                                   |  | -1.53 |
| CAALFM_C106790CA | MRPL19 | mitochondrial 54S ribosomal protein YmL19              |  | -1.53 |
| CAALFM_C304530CA | TEC1   | TEA/ATTS transcription factor                          |  | -1.54 |
| CAALFM_C101990WA | HSP30  | Putative heat shock protein                            |  | -1.54 |
| CAALFM_C303690WA | -      | hypothetical protein                                   |  | -1.55 |
| CAALFM_C504620CA | -      | membrane insertase                                     |  | -1.55 |
| CAALFM_CR04820WA | -      | hypothetical protein                                   |  | -1.55 |
| CAALFM_CR03110WA | -      | glutamate--tRNA ligase                                 |  | -1.55 |
| CAALFM_C501700WA | MRPL36 | mitochondrial 54S ribosomal protein YmL36              |  | -1.55 |
| CAALFM_C402740WA | -      | hypothetical protein                                   |  | -1.56 |



|                  |       |                                                                                                                                               |  |       |
|------------------|-------|-----------------------------------------------------------------------------------------------------------------------------------------------|--|-------|
| CAALFM_CR02470WA | -     | uncharacterized ncRNA                                                                                                                         |  | -1.56 |
| CAALFM_C402130WA | CYT2  | cytochrome c1 heme lyase                                                                                                                      |  | -1.56 |
| CAALFM_C104450CA | FMA1  | Putative oxidoreductase                                                                                                                       |  | -1.56 |
| CAALFM_C403820CA | HRQ2  | Protein of unknown function                                                                                                                   |  | -1.57 |
| CAALFM_C307890WA | TIM8  | protein transporter                                                                                                                           |  | -1.57 |
| CAALFM_C300880WA | KGD1  | alpha-ketoglutarate dehydrogenase                                                                                                             |  | -1.57 |
| CAALFM_CR07170WA | -     | hypothetical protein                                                                                                                          |  | -1.60 |
| CAALFM_C300030CA | -     | hypothetical protein                                                                                                                          |  | -1.61 |
| CAALFM_C300010CA | -     | hypothetical protein                                                                                                                          |  | -1.61 |
| CAALFM_C700510WA | MAC1  | Copper fist transcription factor                                                                                                              |  | -1.62 |
| CAALFM_CR00620CA | ARG1  | argininosuccinate synthase                                                                                                                    |  | -1.62 |
| CAALFM_CR07320CA | -     | mitochondrial 54S ribosomal protein YmL4                                                                                                      |  | -1.62 |
| CAALFM_C104300CA | SSA2  | Hsp70 family chaperone                                                                                                                        |  | -1.62 |
| CAALFM_C104290CA | ACS2  | acetate--CoA ligase                                                                                                                           |  | -1.63 |
| CAALFM_C400520WA | PAM18 | Predicted component of the presequence translocase-associated import motor (PAM complex) involved in protein import into mitochondrial matrix |  | -1.63 |
| CAALFM_C207680WA | -     | mitochondrial 54S ribosomal protein YmL7/YmL5                                                                                                 |  | -1.63 |
| CAALFM_C302270WA | -     | hypothetical protein                                                                                                                          |  | -1.63 |
| CAALFM_C105470WA | MTM1  | Ortholog(s) have pyridoxal phosphate binding activity                                                                                         |  | -1.64 |
| CAALFM_C102880CA | MIA40 | Predicted component of the mitochondrial intermembrane space import machinery                                                                 |  | -1.64 |
| CAALFM_CR04340WA | PIM1  | ATP-dependent Lon protease                                                                                                                    |  | -1.65 |
| CAALFM_C403890WA | PTP2  | tyrosine protein phosphatase                                                                                                                  |  | -1.66 |
| CAALFM_C405020WA | IMG2  | mitochondrial 54S ribosomal protein IMG2                                                                                                      |  | -1.66 |

|                  |        |                                                                                                             |  |       |
|------------------|--------|-------------------------------------------------------------------------------------------------------------|--|-------|
| CAALFM_C108970WA | -      | uncharacterized ncRNA                                                                                       |  | -1.67 |
| CAALFM_C209350WA | TAZ1   | lysophosphatidylcholine acyltransferase                                                                     |  | -1.68 |
| CAALFM_C501640WA | MAS2   | mitochondrial-processing protease subunit alpha                                                             |  | -1.68 |
| CAALFM_C400820WA | -      | hypothetical protein                                                                                        |  | -1.69 |
| CAALFM_C503510CA | -      | hypothetical protein                                                                                        |  | -1.69 |
| CAALFM_C303190CA | -      | hypothetical protein                                                                                        |  | -1.70 |
| CAALFM_C101740WA | CTN1   | carnitine O-acetyltransferase                                                                               |  | -1.70 |
| CAALFM_C206460WA | RTA3   | 7-transmembrane receptor protein involved in regulation of asymmetric lipid distribution in plasma membrane |  | -1.70 |
| CAALFM_C601360WA | -      | hypothetical protein                                                                                        |  | -1.71 |
| CAALFM_C703930CA | MAM33  | Putative mitochondrial acidic matrix protein                                                                |  | -1.72 |
| CAALFM_C300360WA | -      | hypothetical protein                                                                                        |  | -1.74 |
| CAALFM_C504530WA | -      | mitochondrial 37S ribosomal protein RSM26                                                                   |  | -1.74 |
| CAALFM_C110360CA | -      | hypothetical protein                                                                                        |  | -1.74 |
| CAALFM_C112990WA | -      | uncharacterized ncRNA                                                                                       |  | -1.75 |
| CAALFM_C105510CA | RPS27A | ribosomal 40S subunit protein S27A                                                                          |  | -1.77 |
| CAALFM_C113000WA | -      | uncharacterized ncRNA                                                                                       |  | -1.77 |
| CAALFM_C500350CA | -      | hypothetical protein                                                                                        |  | -1.78 |
| CAALFM_C102730WA | -      | hypothetical protein                                                                                        |  | -1.79 |
| CAALFM_C201180WA | COX17  | copper metallochaperone                                                                                     |  | -1.79 |
| CAALFM_C603030WA | SAP5   | Biofilm-specific aspartyl protease                                                                          |  | -1.82 |
| CAALFM_C108960WA | -      | uncharacterized ncRNA                                                                                       |  | -1.83 |
| CAALFM_CR08880CA | -      | hypothetical protein                                                                                        |  | -1.87 |
| CAALFM_C203390CA | HSP78  | chaperone ATPase                                                                                            |  | -1.89 |
| CAALFM_C104820CA | -      | putative mitochondrial 54S ribosomal protein RTC6                                                           |  | -1.90 |

|                  |          |                                                 |            |       |
|------------------|----------|-------------------------------------------------|------------|-------|
| CAALFM_C603230WA | ARG3     | ornithine carbamoyltransferase                  |            | -1.91 |
| CAALFM_C112240CA | -        | putative alanine--tRNA ligase                   |            | -1.91 |
| CAALFM_C101750WA | -        | hypothetical protein                            |            | -1.91 |
| CAALFM_C100980WA | -        | hypothetical protein                            |            | -1.92 |
| CAALFM_C105270CA | -        | hypothetical protein                            |            | -1.92 |
| CAALFM_C112220WA | CDC6     | AAA family ATPase                               |            | -1.93 |
| CAALFM_C402770CA | -        | cell proliferation protein                      |            | -1.94 |
| CAALFM_C503410CA | -        | mitochondrial 54S ribosomal protein YmL20       |            | -1.95 |
| CAALFM_C101730WA | tA(AGC)3 | tRNA-Ala                                        |            | -1.95 |
| CAALFM_C703000CA | -        | mitochondrial 54S ribosomal protein YmL49       |            | -1.97 |
| CAALFM_C602210WA | -        | hypothetical protein                            |            | -2.00 |
| CAALFM_C500280CA | -        | ribonuclease                                    |            | -2.04 |
| CAALFM_C601990WA | PLB1     | Phospholipase B                                 | -4.03±0.13 | -2.13 |
| CAALFM_C403470CA | ECE1     | hypha-specific protein                          | -2.52±0.17 | -2.15 |
| CAALFM_C107530WA | -        | hypothetical protein                            |            | -2.15 |
| CAALFM_C201700CA | HAP42    | Predicted transcription factor                  | -2.48±0.25 | -2.15 |
| CAALFM_C503770CA | -        | hypothetical protein                            |            | -2.19 |
| CAALFM_C303270WA | -        | hypothetical protein                            |            | -2.20 |
| CAALFM_C407140WA | -        | hypothetical protein                            |            | -2.20 |
| CAALFM_C200760CA | -        | hypothetical protein                            |            | -2.22 |
| CAALFM_C114090WA | -        | hypothetical protein                            |            | -2.22 |
| CAALFM_CR03870WA | -        | hypothetical protein                            |            | -2.23 |
| CAALFM_CR06950CA | ATX1     | copper metallochaperone                         | -2.57±0.34 | -2.26 |
| CAALFM_C203950WA | -        | mitochondrial 54S ribosomal protein YmL24/YmL14 |            | -2.27 |
| CAALFM_C208890WA | -        | hypothetical protein                            |            | -2.27 |

|                  |        |                                                                                     |            |       |
|------------------|--------|-------------------------------------------------------------------------------------|------------|-------|
| CAALFM_C301340WA | -      | hypothetical protein                                                                |            | -2.29 |
| CAALFM_CR06100CA | -      | hypothetical protein                                                                |            | -2.30 |
| CAALFM_C600920WA | -      | hypothetical protein                                                                |            | -2.31 |
| CAALFM_C403570WA | HWP1   | Hyphal cell wall protein                                                            |            | -2.31 |
| CAALFM_C110170WA | -      | hypothetical protein                                                                |            | -2.32 |
| CAALFM_CR06490CA | HSP60  | chaperone ATPase                                                                    | -1.34±0.47 | -2.35 |
| CAALFM_CR07540CA | -      | hypothetical protein                                                                |            | -2.36 |
| CAALFM_C112080WA | LCB4   | sphinganine kinase                                                                  |            | -2.41 |
| CAALFM_C102070WA | HSP31  | Putative 30 kda heat shock protein                                                  | -2.38±0.09 | -2.41 |
| CAALFM_C402070WA | PHO114 | Acid phosphatase                                                                    |            | -2.43 |
| CAALFM_CR08830WA | -      | hypothetical protein                                                                |            | -2.49 |
| CAALFM_C106370CA | PBR1   | Protein of unknown function, required for cohesion, adhesion, and biofilm formation | -5.43±1.29 | -2.49 |
| CAALFM_C305080WA | -      | hypothetical protein                                                                |            | -2.52 |
| CAALFM_C501840CA | TAC1   | Zn(2)-Cys(6) transcriptional activator of drug-responsive genes                     | -2.18±0.28 | -2.59 |
| CAALFM_C204010CA | HSP21  | Small heat shock protein                                                            | -2.42±0.16 | -2.63 |
| CAALFM_C204470WA | ADH3   | Putative NAD-dependent (R,R)-butanediol dehydrogenase                               | -1.57±0.06 | -2.64 |
| CAALFM_C503600WA | MDJ1   | Putative member of the HSP40 (DnaJ) family of chaperones                            | -2.77±0.38 | -2.68 |
| CAALFM_C210070WA | -      | hypothetical protein                                                                |            | -2.70 |
| CAALFM_C204000CA | -      | hypothetical protein                                                                |            | -2.70 |
| CAALFM_C113100WA | -      | hypothetical protein                                                                | -2.18±0.43 | -2.89 |
| CAALFM_C207380WA | SSC1   | Hsp70 family ATPase                                                                 | -2.99±0.47 | -3.00 |
| CAALFM_C203110WA | -      | hypothetical protein                                                                | -5.35±1.16 | -3.01 |
| CAALFM_C401910WA | -      | transcription factor TFIIIC subunit                                                 |            | -3.19 |
| CAALFM_CR03120WA | -      | hypothetical protein                                                                |            | -3.19 |

|                  |        |                                              |            |       |
|------------------|--------|----------------------------------------------|------------|-------|
| CAALFM_C401900CA | MDH1-1 | malate dehydrogenase                         | -3.93±0.37 | -4.05 |
| CAALFM_C105260CA | SDH1   | succinate dehydrogenase flavoprotein subunit |            | -4.28 |
| CAALFM_C108790WA | TPO3   | spermine transporter                         | -3.36±0.19 | -4.83 |

**Table S3.** PCR primers used in this study

| <b>Primer</b>       | <b>Sequence (5'-3')</b>      |
|---------------------|------------------------------|
| GSP1-F <sup>a</sup> | TGAAGTCCATCCATTAGGAT         |
| GSP1-R              | ATCTCTATGCCAGTTTGGAA         |
| OP4-F               | TGCCGGTAGCTGGATTAAAG         |
| OP4-R               | CAGTGGCAGTAGAAGCAGTAG        |
| SCW4-F              | GGTGGTAGTGATGGTGGTAAAG       |
| SCW4-R              | GATCCTGAACCAGAGCCTAAAC       |
| AGA1-F              | CACCAGCTACTCCAATGACTAC       |
| AGA1-R              | CGGCAGCATAAGCATCATTTAC       |
| PXP2-F              | TTTGAAGGTAGAGTTGGTATGG       |
| PXP2-R              | GCACTGGCAAATTGTCTTCTAC       |
| PRY1-F              | CTGACTCTGGTTCTGGCTTAC        |
| PRY1-R              | GAAGTTGAGGAGGAACCGATATT      |
| PLB1-F              | CGTGTCTGCTTACAATCCAAATC      |
| PLB1-R              | CATCTTCTCCACCGTCAACTAA       |
| ECE1-F              | GCTGGTATCATTGCTGATAT         |
| ECE1-R              | TTCGATGGATTGTTGAACAC         |
| HAP42-F             | CCCAATACCACAAGCAATGAAG       |
| HAP42-R             | CGACCACCACCACAACCTATTA       |
| ATX1-F              | TG TTCAGGAGCCATTGAAAGAG      |
| ATX1-R              | GCTGAGTAGTTATAACATCAACAGTTTG |
| HSP31-F             | ACACTGCTACCAAGGTCAATC        |
| HSP31-R             | CGGAGAATGCAGCCCATAA          |
| PBR1-F              | TCCGATAGTGAAGAAGTCAATGG      |
| PBR1-R              | GTAGCACCTGGAGTAACGTAAT       |
| TAC1-F              | CAGGGAATGACCCTAACGATAC       |

|         |                         |
|---------|-------------------------|
| TAC1-R  | CCCACATGGATAAGACCCATT   |
| ADH3-F  | GTCCAAGGATGTGGTGGATTAG  |
| ADH3-R  | ACCGCACCTTTAACATCAGAA   |
| SSC1-F  | GTTATCCTTGTCGGTGGTATGT  |
| SSC1-R  | AACAGCTTCATCAGGGTTGATA  |
| MDJ1-F  | CCAAGGTGCTGGTGTACTAT    |
| MDJ1-R  | TGCAGGGATTTCAACAGTCTTA  |
| TPO3-F  | CTGGAGGACTTTCCACTGTTAAT |
| TPO3-R  | GGACCAACACAGAACCCAATA   |
| HWP1-F  | TGGTGCTATTACTATTCCGG    |
| HWP1-R  | CAATAATAGCAGCACCGAAG    |
| ALS3-F  | CTAATGCTGCTACGTATAATT   |
| ALS3-R  | CCTGAAATTGACATGTAGCA    |
| TEC1-F  | AGGTTCCCTGGTTTAAGTG     |
| TEC1-R  | ACTGGTATGTGTGGGTGAT     |
| RBT5-F  | GCCAGAATGTGCCAAAGAATG   |
| RBT5-R  | CACCAGCAAATTGAGGCATAAC  |
| IFD6-F  | CCGTGAAGATGACAGAGAGTTG  |
| IFD6-R  | GACACAAGACACCACCACTATT  |
| CSH1-F  | AGTCAAAGACGACGCAGAAG    |
| CSH1-R  | TTCAGCTGCGGCTAAGATATG   |
| HSP90-F | AGACACCACCATGTCTTCTTAC  |
| HSP90-R | TCTTCAGCTCCATCGGTTTC    |

---

**Figure S1.** ESIMS spectrum of compounds 1 and 2.

(a) ESIMS spectrum of compound 1

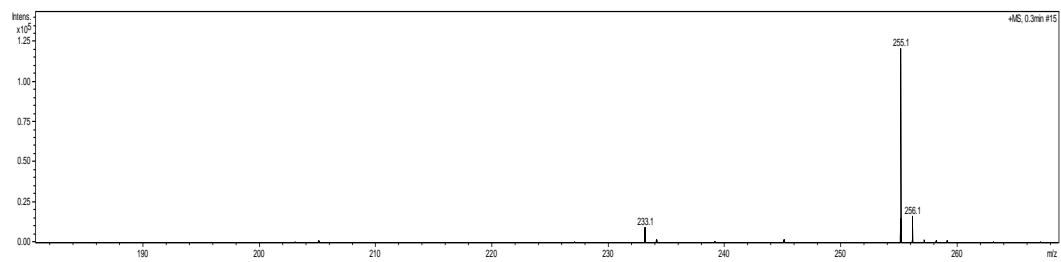

(b) ESIMS spectrum of compound 2

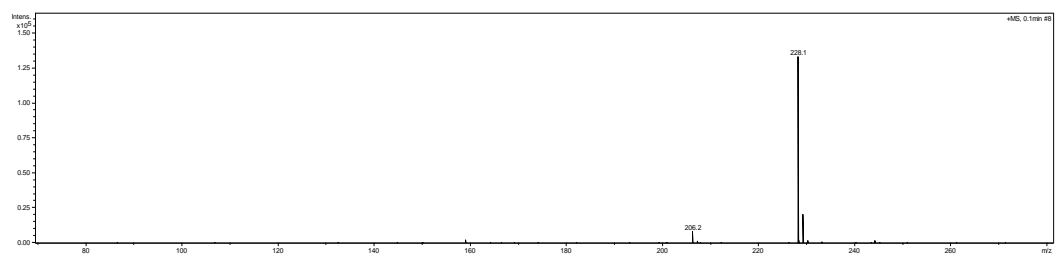



**Figure S2.** Growth curves of *C. albicans* cells treated by compound 1 (50 µg/mL) and compound 2 (100 µg/mL).

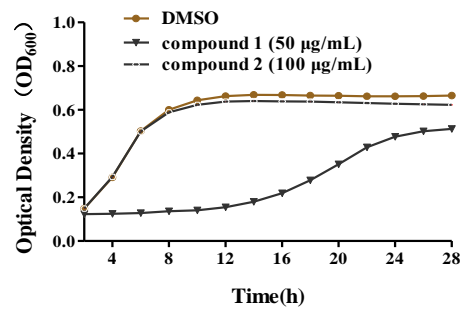

Supplement: marinedrugs-17-00442-s001.pdf [file marinedrugs-17-00442-s001.pdf]
